# Supplementary figures and images for: Vibrational signatures to discriminate liver steatosis grades
Source: Royal Society of Chemistry journal article supplement (doi:10.1039/c4an01679c), 2014-12-24

A

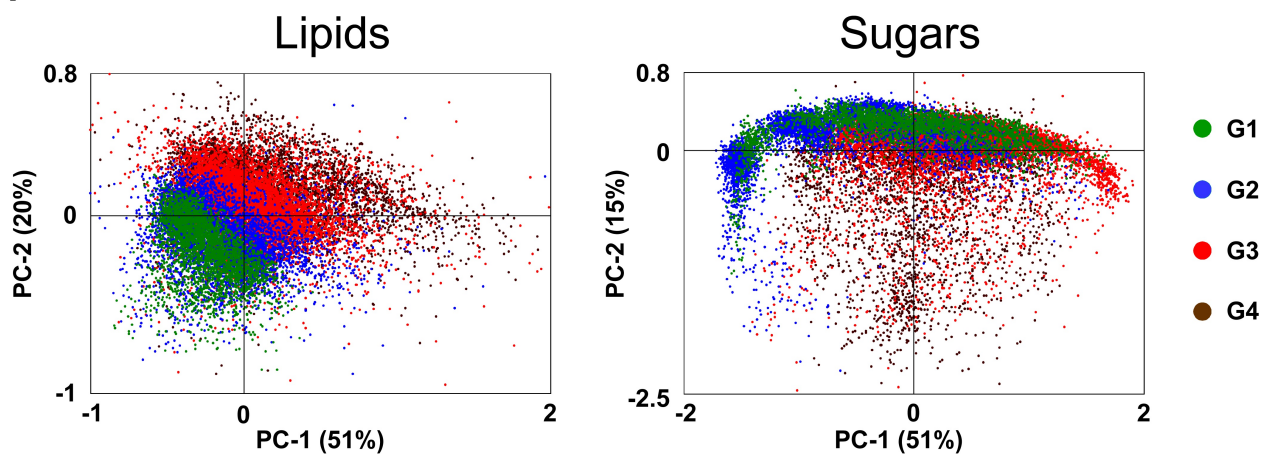

B

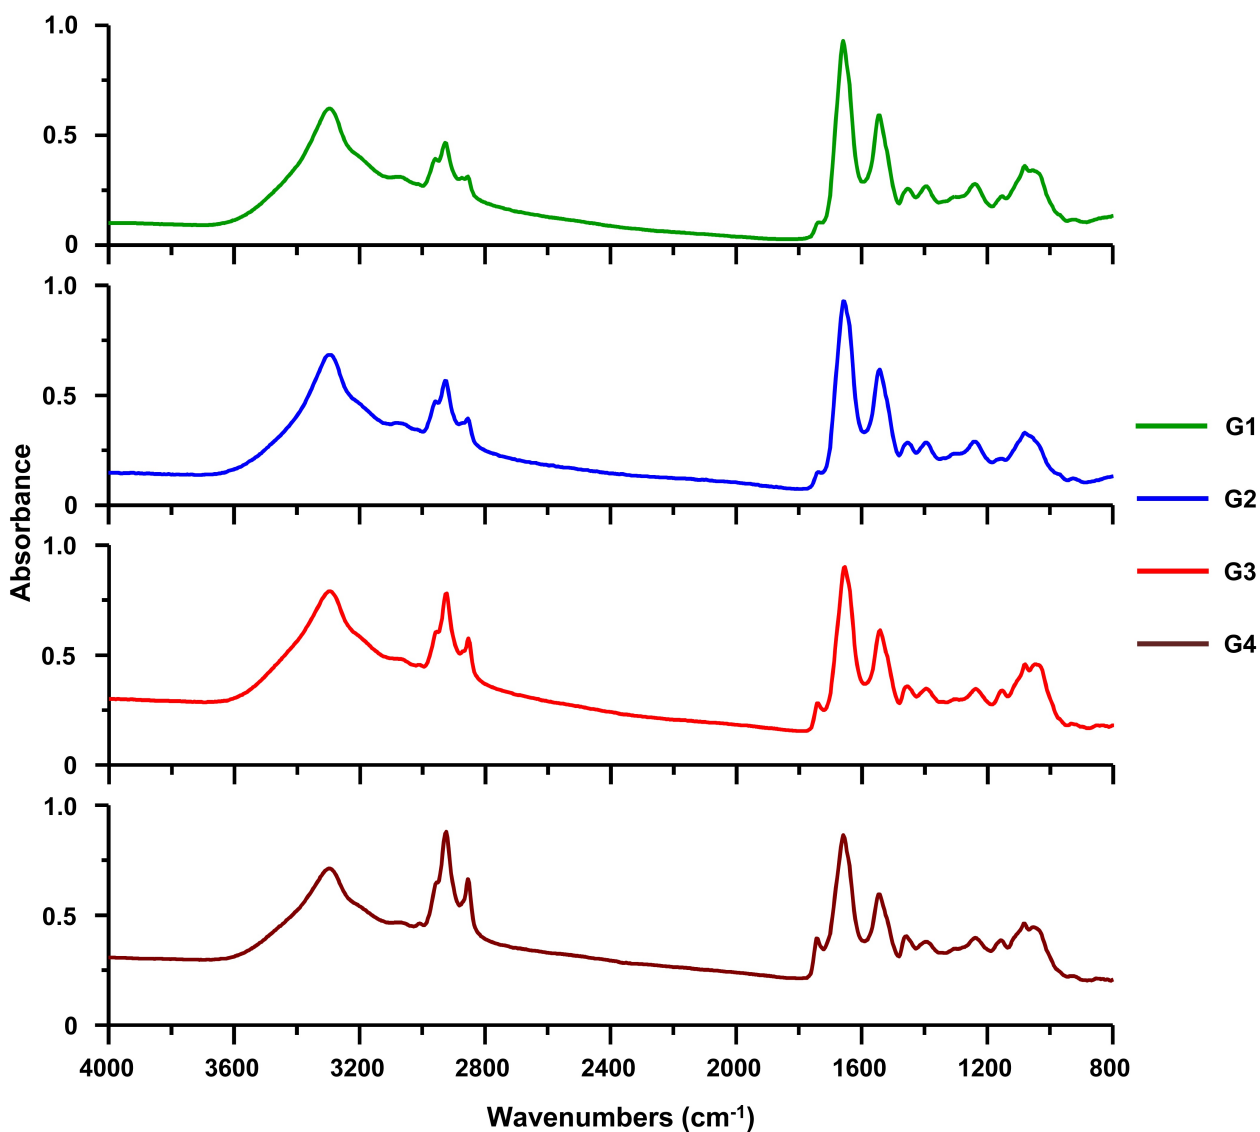

Supplement: c4an01679c1.pdf [file c4an01679c1.pdf]
